# Supplementary material
Source: PubMed Central journal article supplement (PMC10927007)
Supplement: NIHMS1921149-supplement-Supinfo.pdf [file NIHMS1921149-supplement-Supinfo.pdf]

**Aspirin and non-aspirin NSAID use and occurrence of colorectal adenoma in  
Black American women**

Lauren E. Barber, Kimberly A. Bertrand, Shanshan Sheehy, Laura F. White,  
Hemant K. Roy, Lynn Rosenberg, Julie R. Palmer, Jessica L. Petrick

**TABLE OF CONTENTS**

**Supplemental Table 1.** Odds ratios for the association between aspirin use and incident colorectal adenoma.....2

**Supplemental Table 2.** Odds ratios for the association between ever aspirin use vs. non-use and colorectal adenoma, according to strata of age, BMI, smoking status, and type 2 diabetes.....3

**Supplemental Table 3.** Odds ratios for the association between non-aspirin NSAID use and colorectal adenoma, 2009-2018.....4

**Supplemental Table 1. Odds ratios for the association between aspirin use and incident colorectal adenoma. <sup>a</sup>**

| <b>Aspirin use</b>              | <b>Adenoma cases</b> | <b>Lower Endoscopies <sup>b</sup></b> | <b>Age-adjusted OR (95% CI)</b> | <b>MV-adjusted OR (95% CI) <sup>c</sup></b> |
|---------------------------------|----------------------|---------------------------------------|---------------------------------|---------------------------------------------|
| Non-use <sup>d</sup>            | 399                  | 24,659                                | 1.00 (ref)                      | 1.00 (ref)                                  |
| Ever use                        | 454                  | 28779                                 | 0.86 (0.75-1.00)                | 0.88 (0.76-1.02)                            |
| Past                            | 201                  | 13108                                 | 0.86 (0.72-1.03)                | 0.88 (0.74-1.05)                            |
| Current                         | 253                  | 15671                                 | 0.87 (0.73-1.02)                | 0.89 (0.75-1.05)                            |
| Duration of use                 |                      |                                       |                                 |                                             |
| <5 years                        | 215                  | 14,010                                | 0.88 (0.74-1.04)                | 0.89 (0.75-1.06)                            |
| 5-9 years                       | 122                  | 7,386                                 | 0.89 (0.72-1.10)                | 0.91 (0.73-1.12)                            |
| ≥10 years                       | 110                  | 6,355                                 | 0.86 (0.69-1.08)                | 0.88 (0.70-1.10)                            |
| Per 5-year increase in duration |                      |                                       | 0.95 (0.87-1.03)                | 0.96 (0.88-1.04)                            |

OR, Odds ratio; CI, Confidence interval; MV, Multivariable.

<sup>a</sup> Incident colorectal adenomas were defined as any adenoma occurring among study participants who reported ≥2 lower endoscopies and were adenoma-free at the first lower endoscopy.

<sup>b</sup> Total number of lower endoscopies among the 23,228 participants with at least two lower endoscopies reported. Some participants reported more than two lower endoscopies over the study period.

<sup>c</sup> Odds ratios adjusted for age (continuous), family history of colorectal cancer (yes, no), smoking status (never, past, current), alcohol consumption (non-current, current 1-6, current ≥7 drinks/week), vigorous exercise (none, <5, ≥5 hours/week), red meat consumption (quartiles), type 2 diabetes (yes, no), and postmenopausal hormone use (yes, no).

<sup>d</sup> Non-users are defined as participants who did not report regular aspirin use during the study period.

**Supplemental Table 2. Odds ratios for the association between ever aspirin use vs. non-use and colorectal adenoma, according to strata of age, BMI, smoking status, and type 2 diabetes.**

| Stratifying variables | Adenoma cases |                      | MV-adjusted OR (95% CI) <sup>b</sup> |
|-----------------------|---------------|----------------------|--------------------------------------|
|                       | Ever use      | Non-use <sup>a</sup> |                                      |
| Age                   |               |                      |                                      |
| <50 years             | 138           | 359                  | 0.88 (0.71-1.08)                     |
| ≥50 years             | 688           | 679                  | 0.87 (0.78-0.97)                     |
| BMI                   |               |                      |                                      |
| <25                   | 113           | 251                  | 0.69 (0.54-0.88)                     |
| 25-29                 | 292           | 357                  | 0.91 (0.77-1.08)                     |
| 30-35                 | 209           | 228                  | 0.93 (0.77-1.14)                     |
| ≥35                   | 209           | 192                  | 0.90 (0.72-1.12)                     |
| Smoking status        |               |                      |                                      |
| Never                 | 444           | 602                  | 0.90 (0.79-1.03)                     |
| Past                  | 283           | 296                  | 0.90 (0.75-1.07)                     |
| Current               | 99            | 140                  | 0.66 (0.50-0.87)                     |
| Type 2 diabetes       |               |                      |                                      |
| No                    | 633           | 952                  | 0.83 (0.75-0.93)                     |
| Yes                   | 193           | 86                   | 1.05 (0.80-1.38)                     |

BMI, Body mass index; MV, Multivariable; OR, Odds ratio; CI, Confidence interval.

<sup>a</sup> Non-users are defined as participants who did not report regular aspirin use during the study period.

<sup>b</sup> Odds ratios adjusted for age (continuous), family history of colorectal cancer (yes, no), smoking status (never, past, current), alcohol consumption (non-current, current 1-6, current ≥7 drinks/week), vigorous exercise (none, <5, ≥5 hours/week), red meat consumption (quartiles), type 2 diabetes (yes, no), and postmenopausal hormone use (yes, no).

**Supplemental Table 3. Odds ratios for the association between non-aspirin NSAID use and colorectal adenoma, 2009-2018.**

| <b>Non-aspirin NSAID use</b> | <b>Adenoma cases</b> | <b>Lower Endoscopies<sup>a</sup></b> | <b>Age-adjusted OR (95% CI)</b> | <b>MV-adjusted OR (95% CI)<sup>b</sup></b> |
|------------------------------|----------------------|--------------------------------------|---------------------------------|--------------------------------------------|
| Non-use <sup>c</sup>         | 572                  | 29,217                               | 1.00 (ref)                      | 1.00 (ref)                                 |
| Ever                         | 244                  | 12,307                               | 1.02 (0.87-1.18)                | 1.02 (0.87-1.19)                           |
| Past                         | 97                   | 5,101                                | 0.98 (0.79-1.22)                | 0.99 (0.79-1.23)                           |
| Current                      | 147                  | 7,206                                | 1.04 (0.87-1.25)                | 1.04 (0.86-1.25)                           |
| Duration of use              |                      |                                      |                                 |                                            |
| 1-2 years                    | 152                  | 7,885                                | 0.98 (0.82-1.18)                | 0.99 (0.83-1.19)                           |
| 3-4 years                    | 60                   | 2,944                                | 1.05 (0.80-1.37)                | 1.04 (0.80-1.36)                           |
| ≥5 years                     | 32                   | 1,451                                | 1.14 (0.80-1.63)                | 1.12 (0.78-1.61)                           |
| Per 1-year increase          |                      |                                      | 1.01 (0.96-1.06)                | 1.01 (0.96-1.06)                           |

NSAID, Non-steroidal anti-inflammatory drugs; OR, Odds ratio; CI, Confidence interval; MV, Multivariable.

<sup>a</sup> Total number of lower endoscopies among the 25,142 participants with at least one lower endoscopy reported after 2009. Some participants reported more than one lower endoscopy over the study period.

<sup>b</sup> Odds ratios adjusted for age (continuous), family history of colorectal cancer (yes, no), smoking status (never, past, current), alcohol consumption (non-current, current 1-6, current ≥7 drinks/week), vigorous exercise (none, <5, ≥5 hours/week), red meat consumption (quartiles), type 2 diabetes (yes, no), and postmenopausal hormone use (yes, no).

<sup>c</sup> Non-users are defined as participants who did not report regular aspirin use during the study period.
